# Supplementary material for: The Kavalactone Content and Profile of Fiji Kava Sold on the Local Market
Source: MDPI journal article supplement (doi:10.3390/beverages10010004), 2023-12-25
Supplement: s1 [file s1]

# The Kavalactone Content and Profile of Fiji Kava Sold on the Local Market

Tibor Pasinszki \* and Deepti Darshani Devi

College of Engineering, Science and Technology, Fiji National University, P.O. Box 3722, Suva, Fiji; [deeptidarshanidevi@yahoo.com](mailto:deeptidarshanidevi@yahoo.com)

\* Correspondence: [tibor.pasinszki@fnu.ac.fj](mailto:tibor.pasinszki@fnu.ac.fj)

## Supplementary Materials

### Content:

|                  |                                                                             |        |
|------------------|-----------------------------------------------------------------------------|--------|
| <b>Figure S1</b> | Decomposition/isomerization of yangonin                                     | page 1 |
| <b>Figure S2</b> | Concentrations of kavalactone in various parts of a freeze-dried kava plant | page 2 |

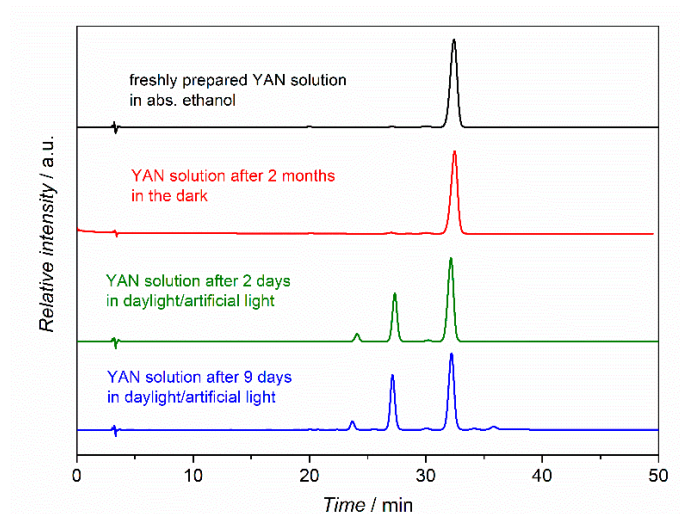

**Figure S1.** a) Chromatogram of a freshly prepared ethanolic solution of yangonin, b) chromatogram after keeping the ethanolic yangonin solution in the sample compartment of the HPLC instrument for 2 months, c) keeping the same solution on the laboratory bench under daylight/artificial light for two days, and d) keeping the solution on the laboratory bench for an additional 9 days.

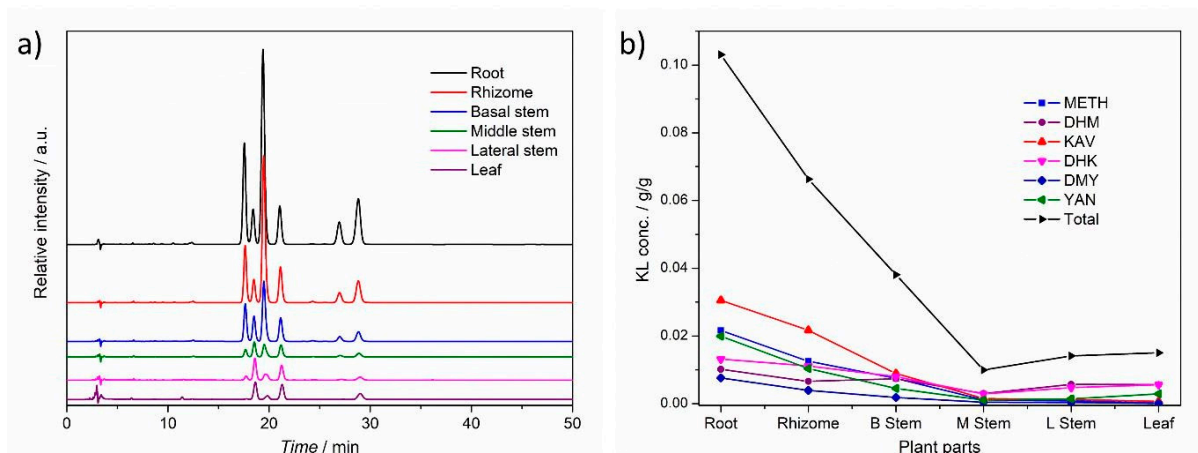

**Figure S2.** a) Chromatograms of extractions of various parts of a freeze-dried green kava plant, b) kavalactone concentration in various parts of a freeze-dried green kava plant (B= basal, M= middle, L= lateral).
